# Supplementary material
Source: PubMed Central journal article supplement (PMC2825422)
Supplement: supp_M109.068445_jbc.M109.068445-1.pdf [file supp_M109.068445_jbc.M109.068445-1.pdf]

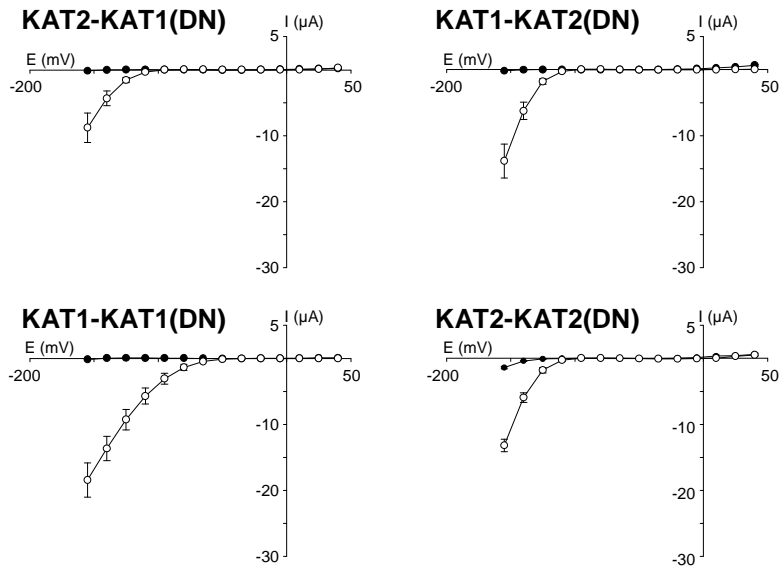

**FIGURE S1. Both subunits composing the dimer participate in the formation of the tetrameric channel.** macroscopic currents recorded from oocytes injected with different tandem constructs (1 ng of cRNA), each consisted of one wild-type subunit associated with another wild-type (close symbols) or one dominant negative subunit (open symbols). Steady state current were recorded with the voltage-clamp technique in a 100 mM K<sup>+</sup> external solution and plotted against the applied membrane potential. In all recordings, the holding potential was -40 mV, voltage steps were applied to potentials ranging between +40 and -155 mV with -15 mV decrements. Data are means  $\pm$  SE (n=5-10).

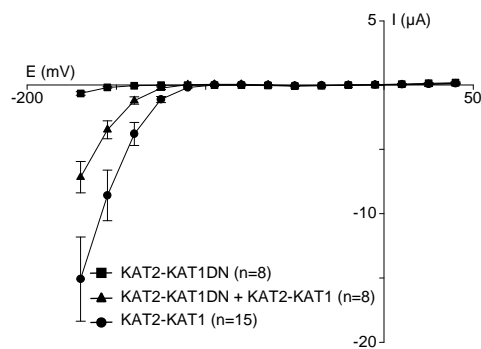

**FIGURE S2. Tandem cRNA construct encoding wild type subunit linked to a dominant negative one inhibits currents catalyzed by their corresponding wild type tandem.** Steady state current were recorded with the voltage-clamp technique in a 100 mM K<sup>+</sup> external solution and plotted against the applied membrane potential. In all recordings, the holding potential was -40 mV, voltage steps were applied to potentials ranging between +40 and -170 mV with -15 mV decrements. Data are means  $\pm$  SE (n=8-15).
